# Supplementary material for: Efficient Removal of Cr(VI) by TiO2 Based Micro-Nano Reactor via the Synergy of Adsorption and Photocatalysis
Source: Nanomaterials (Basel). 2022 Jan 17;12(2):291. doi: 10.3390/nano12020291 (PMC8778119; doi:10.3390/nano12020291)
Supplement: Supplementary file 1 [file nanomaterials-12-00291-s001.zip › nanomaterials-1550603-supplementary.pdf]

# Efficient Removal of Cr(VI) by TiO<sub>2</sub> Based Micro-Nano Reactor via the Synergy of Adsorption and Photocatalysis

Yu Song <sup>1</sup>, Xi Lu <sup>2</sup>, Zhibao Liu <sup>2</sup>, Wenfei Liu <sup>3</sup>, Ligang Gai <sup>2</sup>, Xiang Gao <sup>2,\*</sup> and Hongfang Ma <sup>1,2,\*</sup>

<sup>1</sup> School of Environmental Science and Engineering, Qilu University of Technology (Shandong Academy of Sciences), Jinan 250353, China; 1043119575@stu.qlu.edu.cn

<sup>2</sup> Engineering & Technology Center of Electrochemistry, School of Chemistry and Chemical Engineering, Qilu University of Technology (Shandong Academy of Sciences), Jinan 250353, China; Lahshiy@outlook.com (X.L.); 15853177979@163.com (Z.L.); liganggai@126.com (L.G.);

<sup>3</sup> Department of Chemistry and Biochemistry, University of California, Los Angeles, CA 90095, USA; wenfei95@gmail.com

\* Correspondence: gaixiang01@qlu.edu.cn (X.G.); mhf@qlu.edu.cn (H.M.)

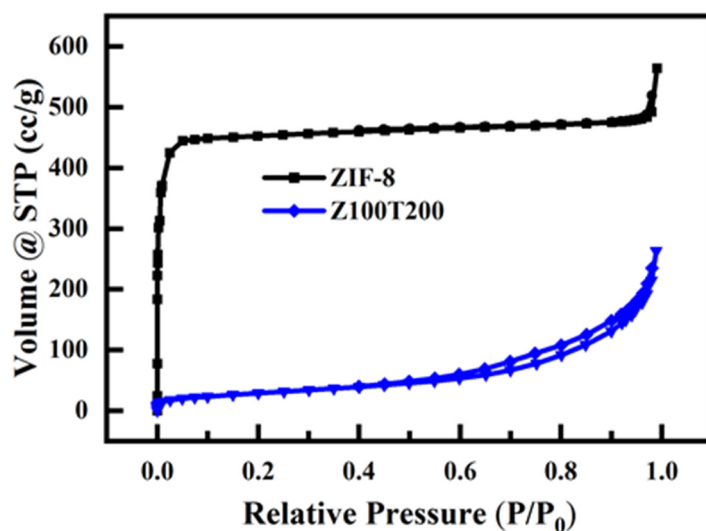

**Figure S1.** N<sub>2</sub> adsorption/desorption isotherms of ZIF-8 and Z100T200

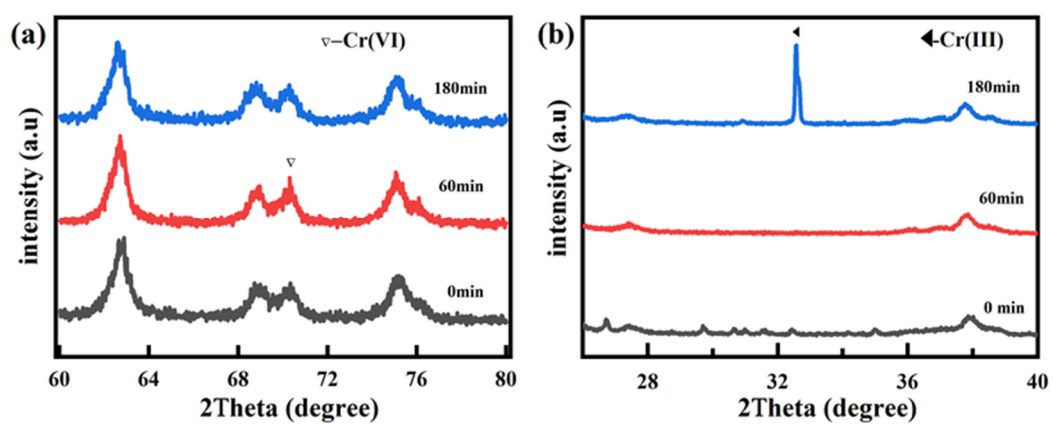

Figure S2. (a) XRD-Cr(VI) and (b) XRD-Cr(III) atlases of Z100T200 at different catalytic stages.

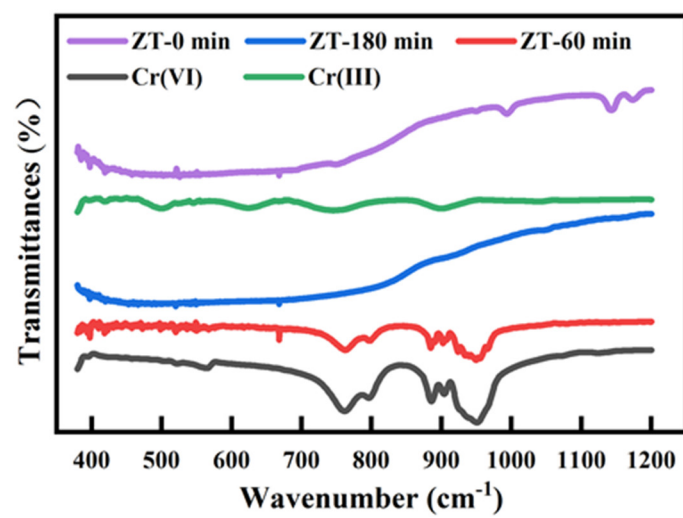

Figure S3 FTIR-Cr(VI) atlases of Z100T200 at different catalytic stages.

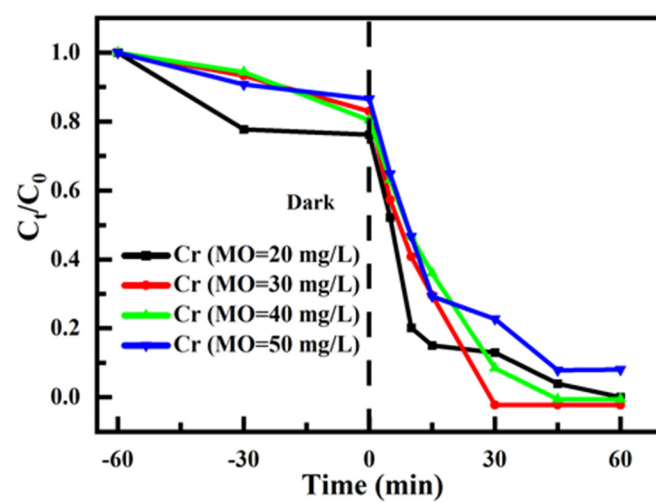

**Figure S4** Effect of different concentrations of MO on the removal efficiency of Cr (VI).

**Table S1.**  $S_{\text{BET}}$ , pore volume and average pore diameter of ZIF-8 and Z100T200.

| <b>Sample</b> | <b><math>S_{\text{BET}}</math> (m<sup>2</sup>/g)</b> | <b>Pore volume (cm<sup>3</sup>/g)</b> | <b>Average pore diameter (nm)</b> |
|---------------|------------------------------------------------------|---------------------------------------|-----------------------------------|
| ZIF-8         | 1899.6                                               | 0.872                                 | 1.837                             |
| Z100T200      | 107.0                                                | 0.407                                 | 15.223                            |
